# Supplementary material for: Synthesis, Characterization, and In Vitro Insulin-Mimetic Activity Evaluation of Valine Schiff Base Coordination Compounds of Oxidovanadium(V)
Source: MDPI journal article supplement (doi:10.3390/biomedicines9050562), 2021-05-17
Supplement: s1 [file s1]

## Supplementary material

# Synthesis, Characterization, and In Vitro Insulin-Mimetic Activity Evaluation of Valine Schiff Base Coordination Compounds of Oxidovanadium(V)

Mihaela Turtoi<sup>1\*</sup>, Maria Anghelache<sup>1</sup>, Andrei A. Patrascu<sup>2</sup>, Catalin Maxim<sup>2</sup>, Ileana Manduteanu<sup>1</sup>, Manuela Calin<sup>1\*</sup>, Delia-Laura Popescu<sup>2\*</sup>

<sup>1</sup> "Medical and Pharmaceutical Bionanotechnologies" Laboratory, Institute of Cellular Biology and Pathology "Nicolae Simionescu" of the Romanian Academy, 8 B.P. Hasdeu, 050568-Bucharest, Romania; [mihaela.carnuta@icbp.ro](mailto:mihaela.carnuta@icbp.ro), [maria.anghelache@icbp.ro](mailto:maria.anghelache@icbp.ro), [ileana.manduteanu@icbp.ro](mailto:ileana.manduteanu@icbp.ro), [manuela.calin@icbp.ro](mailto:manuela.calin@icbp.ro).

<sup>2</sup> Department of Inorganic Chemistry, Faculty of Chemistry, University of Bucharest, 23 Dumbrava Roşie, 020464-Bucharest, Romania; [andrei\\_alunel@yahoo.com](mailto:andrei_alunel@yahoo.com), [catalin.maxim@chimie.unibuc.ro](mailto:catalin.maxim@chimie.unibuc.ro), [delia.popescu@chimie.unibuc.ro](mailto:delia.popescu@chimie.unibuc.ro).

\*Corresponding authors:

M.T. [mihaela.carnuta@icbp.ro](mailto:mihaela.carnuta@icbp.ro)

M.C. [manuela.calin@icbp.ro](mailto:manuela.calin@icbp.ro)

D.-L.P. [delia.popescu@chimie.unibuc.ro](mailto:delia.popescu@chimie.unibuc.ro)

## Table of Contents

|                                  | Page     |
|----------------------------------|----------|
| <b>Methods</b>                   | <b>3</b> |
| <b>The Stern–Volmer equation</b> | <b>3</b> |
| <b>Results</b>                   | <b>4</b> |
| <b>Figure S1</b>                 | <b>4</b> |
| <b>Figure S2</b>                 | <b>4</b> |
| <b>Figure S3</b>                 | <b>5</b> |
| <b>Figure S4</b>                 | <b>5</b> |
| <b>Table S1</b>                  | <b>6</b> |
| <b>Table S2</b>                  | <b>6</b> |
| <b>Table S3</b>                  | <b>6</b> |
| <b>Table S4</b>                  | <b>7</b> |
| <b>References</b>                | <b>8</b> |

## 1. Methods

### The Stern–Volmer equation

The Stern–Volmer equation [1] is:

$$I_0/I = 1 + K_q\tau_0[Q] = 1 + K_{sv}[Q],$$

where:  $I_0$  = the fluorescence intensities of free BSA solution at 347 nm,

$I$  = the fluorescence intensities of BSA solution at 347 nm in the presence of vanadium complexes,

$[Q]$  = the concentration of vanadium complexes,

$\tau_0$  = the fluorescence lifetime of the biopolymer ( $10^{-8}$  s),

$K_q$  = the collision quenching constant;

$K_{sv}$  = the Stern-Volmer constant.

Stern–Volmer plots of the BSA fluorescence quenching in the presence of each compound are represented in Fig. S4, together with their linear best fit in which  $y = I_0/I$ ,  $x = [Q]$ ,  $a$  = slope of the line, and  $b$  = y-intercept. The plots exhibit a good linear relationship with  $R^2$  between 0.9794 and 0.9965. The fluorescence intensities are the average of three recordings measured at a scanning speed of 250 nm/min, with an excitation and emission bandwidth of 5 nm.

## 2. Results

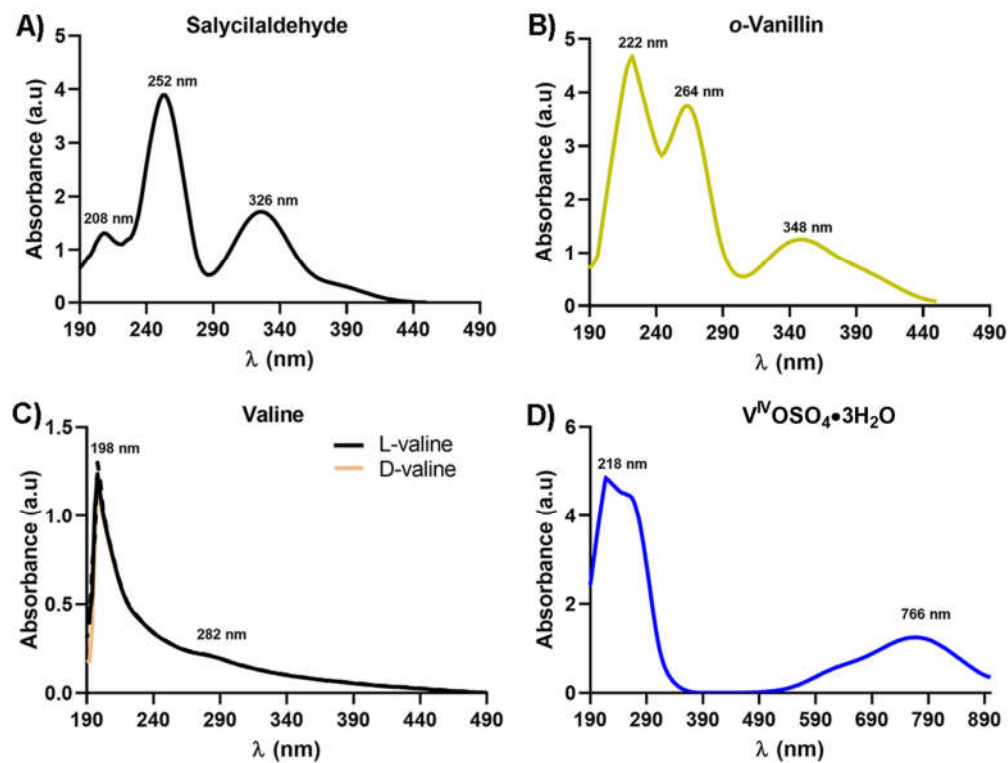

**Figure S1.** Absorption spectra of  $5 \times 10^{-4}$  M salicylaldehyde (A), *o*-vanillin (B),  $2 \times 10^{-3}$  M D-/L-valine (C), and  $7.2 \times 10^{-2}$  M  $V^{IV}OSO_4 \cdot 3H_2O$  (D) in phosphate-buffered saline (PBS) at pH 7.4.

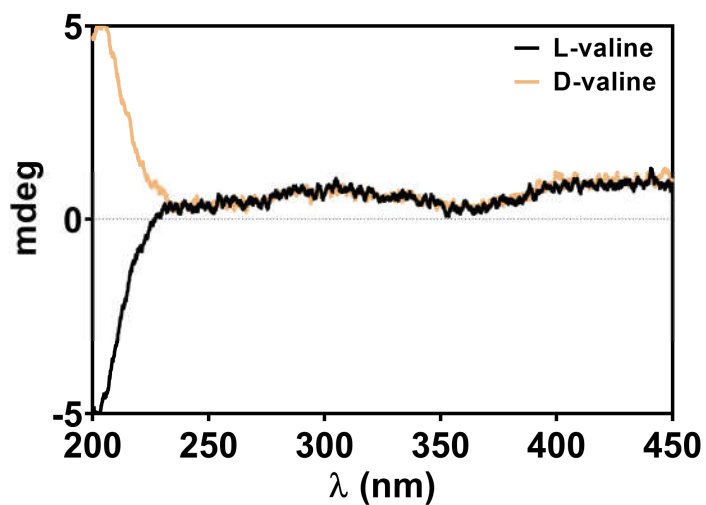

**Figure S2.** CD spectra of  $2 \times 10^{-2}$  M L-/D-valine in phosphate-buffered saline (PBS) at pH 7.4.

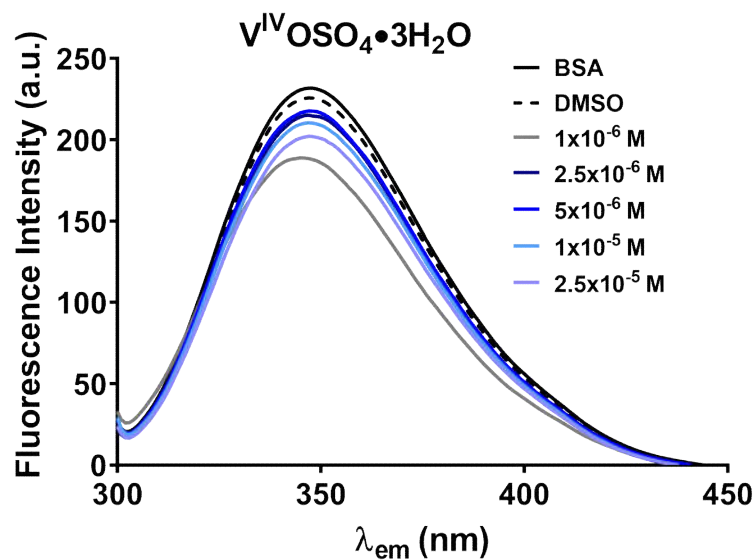

**Figure S3.** Fluorescence spectra of the  $2 \times 10^{-6}$  M BSA in phosphate-buffered saline (PBS) at pH 7.4, in the presence of various concentrations ( $1$ – $25 \times 10^{-6}$  M) of  $V^{IV}OSO_4 \cdot 3H_2O$ .

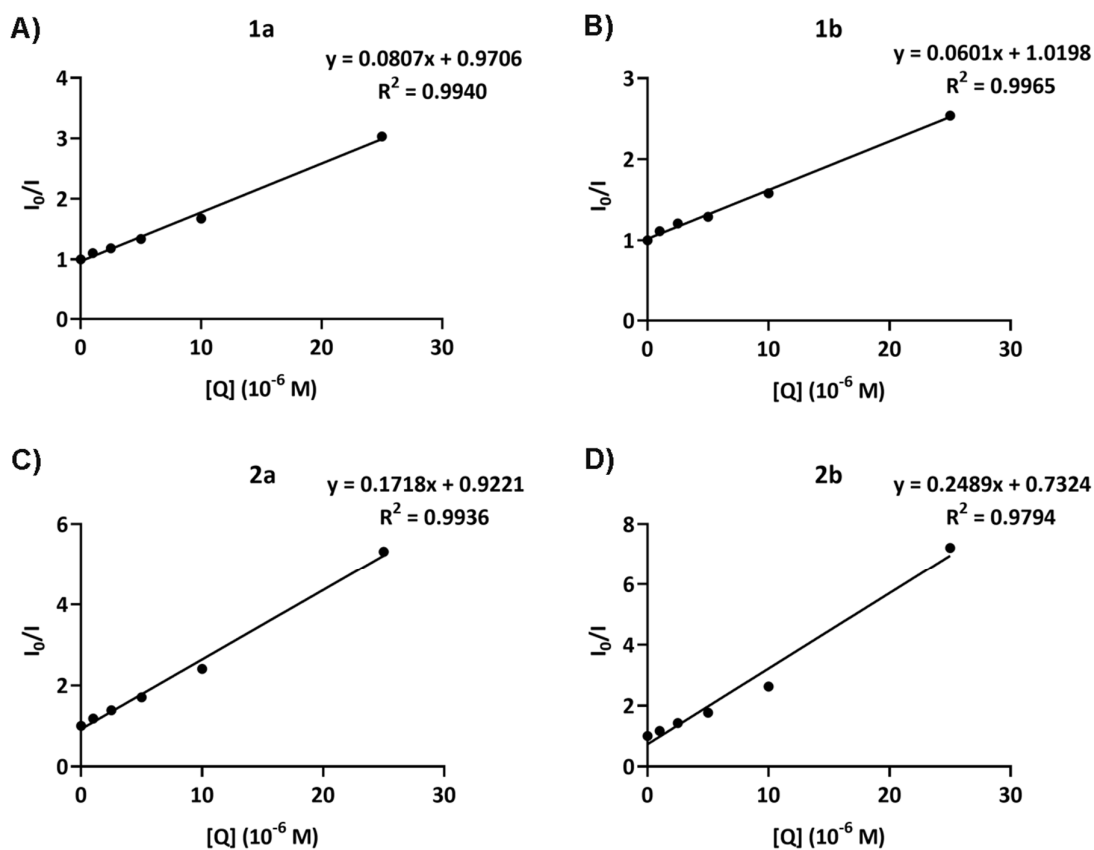

**Figure S4.** The plots of  $I_0/I$  vs.  $[Q]$  for 1a (A), 1b (B), 2a (C), and 2b (D).

**Table S1.** The main infrared absorption frequencies ( $cm^{-1}$ ) corresponding to various groups for 1a, 1b, 2a, and 2b complexes.

| $\nu$ (cm <sup>-1</sup> )   | 1a        | 1b        | 2a        | 2b        |
|-----------------------------|-----------|-----------|-----------|-----------|
| $\nu$ O-H                   | 3703      | 3701      | 3702-3400 | 3702-3400 |
| $\nu$ C-H methyl            | 2966-2870 | 2966-2870 | 2966-2872 | 2966-2872 |
| $\nu$ C=N                   | 1712-1683 | 1712-1683 | 1680      | 1680      |
| $\nu_{as}$ COO <sup>-</sup> | 1602      | 1602      | 1627      | 1627      |
| $\nu$ C=C                   | 1554      | 1554      | 1570      | 1570      |
| $\nu_s$ COO <sup>-</sup>    | 1394      | 1394      | 1411      | 1411      |
| $\nu$ C <sub>Ph</sub> -O    | 1286      | 1286      | 1259      | 1259      |
| $\nu$ V=O                   | 991       | 991       | 974       | 974       |
| $\nu_{as}$ (V-O-V)          | 761       | 761       | 744       | 744       |
| $\nu$ V-N                   | 571       | 571       | 597       | 597       |
| $\nu$ V-O                   | 451       | 451       | 459       | 459       |

**Table S2.** The main infrared absorption frequencies (cm<sup>-1</sup>) corresponding to various groups in the precursors of oxidovanadium(V) complexes.

| $\nu$ (cm <sup>-1</sup> )   | Valine    | Salicylaldehyde | <i>o</i> -Vanillin |
|-----------------------------|-----------|-----------------|--------------------|
| $\nu$ O-H                   | 3160      | 3064            | 3015               |
| $\nu$ C-H methyl            | 2958      | -               | 2973               |
| $\nu$ N-H                   | 2625-2110 | -               | -                  |
| $\nu$ C=O                   | -         | 1664            | 1639               |
| $\nu_{as}$ COO <sup>-</sup> | 1612      | -               | -                  |
| $\nu$ C=C                   | -         | 1487            | 1455               |
| $\nu_s$ COO <sup>-</sup>    | 1323      | -               | -                  |
| $\nu$ O-H                   | -         | 1386            | 1389               |
| $\nu$ C <sub>Ph</sub> -O    | -         | 1276            | 1259               |

**Table S3.** The crystallographic data of 1a and 2a.

| Compound                                | 1a                                                                            | 2a                                                                            |
|-----------------------------------------|-------------------------------------------------------------------------------|-------------------------------------------------------------------------------|
| Formula                                 | C <sub>48</sub> H <sub>56</sub> N <sub>4</sub> O <sub>20</sub> V <sub>4</sub> | C <sub>28</sub> H <sub>34</sub> N <sub>2</sub> O <sub>13</sub> V <sub>2</sub> |
| Formula weight/ g mol <sup>-1</sup>     | 1212.72                                                                       | 710.47                                                                        |
| T/K                                     | 293(2)                                                                        | 293(2)                                                                        |
| $\lambda/\text{\AA}$                    | 0.71073                                                                       | 0.71073                                                                       |
| Crystal system                          | Hexagonal                                                                     | Monoclinic                                                                    |
| Space group                             | P6 <sub>1</sub>                                                               | C2                                                                            |
| Unit cell                               |                                                                               |                                                                               |
| a/ $\text{\AA}$                         | 14.5093(2)                                                                    | 23.399(5)                                                                     |
| b/ $\text{\AA}$                         | 14.5093(4)                                                                    | 9.4811(19)                                                                    |
| c/ $\text{\AA}$                         | 45.9511(4)                                                                    | 7.4902(15)                                                                    |
| $\alpha/\text{deg}$                     | 90                                                                            | 90                                                                            |
| $\beta/\text{deg}$                      | 90                                                                            | 92.67(3)                                                                      |
| $\gamma/\text{deg}$                     | 120                                                                           | 90                                                                            |
| V/ $\text{\AA}^3$                       | 8377.6(2)                                                                     | 1659.9(6)                                                                     |
| Z                                       | 6                                                                             | 2                                                                             |
| Calculated density/g cm <sup>-3</sup>   | 1.442                                                                         | 1.421                                                                         |
| Absorption coefficient/cm <sup>-1</sup> | 0.724                                                                         | 0.627                                                                         |
| F(000)                                  | 3744                                                                          | 736                                                                           |
| Crystal size/mm × mm × mm               | 0.24 × 0.12 × 0.09                                                            | 0.4 × 0.2 × 0.1                                                               |
| $\theta$ range/deg                      | 1.621 to 24.508                                                               | 2.318 to 24.999                                                               |
| Limiting indices                        | -16 < h < 16,<br>-16 < k < 16<br>-53 < l < 49                                 | -27 < h < 27,<br>-10 < k < 11,<br>-8 < l < 8                                  |

|                                              |                             |                             |
|----------------------------------------------|-----------------------------|-----------------------------|
| Collected reflections                        | 36236                       | 4602                        |
| Symmetry independent reflections             | 9016                        | 2453                        |
| Rint                                         | 0.0583                      | 0.1662                      |
| Data/restraints/ parameters                  | 9016 / 13 / 696             | 2453 / 1 / 204              |
| GOF on F2                                    | 1.064                       | 1.132                       |
| Final R indices                              | R1 = 0.0573<br>wR2 = 0.1502 | R1 = 0.0832<br>wR2 = 0.1882 |
| Largest diff peak and hole/e Å <sup>-3</sup> | 0.546 and -0.342            | 0.613 and -0.515            |
| Flack parameter                              | 0.01(2)                     | 0.06(13)                    |

**Table S4.** Summary of IC<sub>50</sub> values (M) calculated for 1a, 1b, 2a, 2b, V<sup>IV</sup>OSO<sub>4</sub>•3H<sub>2</sub>O, and cisplatin from dose-response cytotoxicity data generated by XTT assay, measuring the viability of HepG2 cells exposed for 24 hours to the compounds.

| Compound                                            | IC <sub>50</sub> (M) ± SD (M)                |
|-----------------------------------------------------|----------------------------------------------|
| 1a                                                  | 2.3x10 <sup>-4</sup> ± 2.4x10 <sup>-5</sup>  |
| 1b                                                  | 2.0x10 <sup>-4</sup> ± 4.3x10 <sup>-5</sup>  |
| 2a                                                  | 2.3x10 <sup>-4</sup> ± 2.2x10 <sup>-5</sup>  |
| 2b                                                  | 2.3x10 <sup>-4</sup> ± 2.9x10 <sup>-5</sup>  |
| V <sup>IV</sup> OSO <sub>4</sub> •3H <sub>2</sub> O | 3.3x10 <sup>-4</sup> ± 15.8x10 <sup>-5</sup> |
| Cisplatin                                           | 1.1x10 <sup>-5</sup> ± 4.9x10 <sup>-7</sup>  |

## References

1. Guo, Q.; Li, L.; Dong, J.; Liu, H.; Xu, T.; Li, J. Synthesis, crystal structure and interaction of l-valine Schiff base divanadium(V) complex containing a V<sub>2</sub>O<sub>3</sub> core with DNA and BSA. *Spectrochim. Acta Part A Mol. Biomol. Spectrosc.* **2013**, *106*, 155–162, doi:10.1016/j.saa.2012.12.089.
